# Supplementary material
Source: PubMed Central journal article supplement (PMC2997449)
Supplement: jvr0048-0236-s01.pdf [file jvr0048-0236-s01.pdf]

Marino\_FigS1

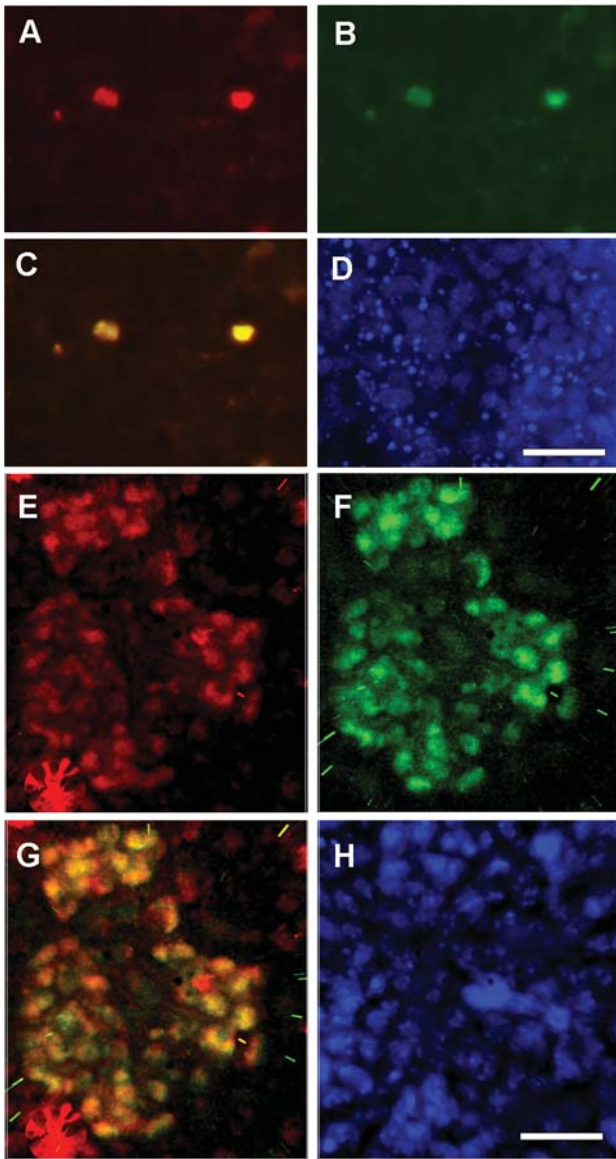

**Figure S1: Prox1 positive endothelial cell clusters in the EBs are also LYVE-1 positive.**

Double immunofluorescent staining for LYVE-1 (A, C, E, G) and Prox1 (B, C, F, G) showed that EB treatment with RA+cAMP induced expression of Prox1 (F, G) in LYVE-1+ (E, G) endothelial cell clusters as compared with control (A-D). Cell nuclei: D, H. Scale bars: 20 μm.

## Marino\_FigS2

A

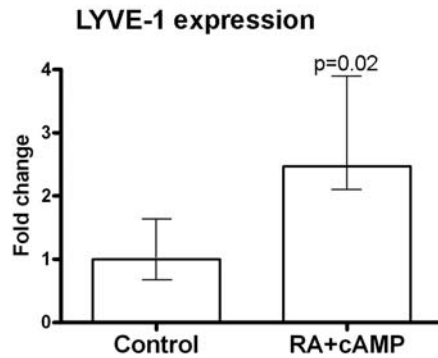

B

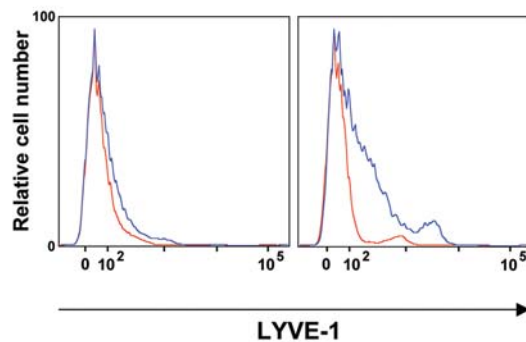

C

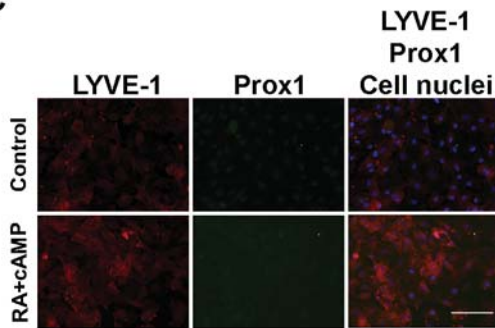

**Figure S2: HUVECs upregulate LYVE-1 expression after RA+cAMP treatment.** (A) Exposure of HUVECs to RA and cAMP for 12h, lead to an upregulation of LYVE-1 mRNA expression as shown by real-time RT-PCR; data are expressed as mean fold change + SEM (n=3). (B) Treatment resulted in an upregulation of LYVE-1 at the protein level as shown by FACS analysis. The profile on the left hand side indicates negative controls, whereas LYVE-1 antibody reactivity is plotted in the right hand side profile. X-axis represents the fluorescence intensity on a logarithmic scale whereas the Y-axis shows number of events normalized to the highest cell count; one representative experiment out of three is depicted; (C) Double immunofluorescence stains for LYVE-1 and Prox1 of HUVECs treated or not with RA+cAMP showed an upregulation of LYVE-1 but not Prox1 protein expression after treatment; scale bar 20  $\mu$ m.
